# Supplementary material
Source: PubMed Central journal article supplement (PMC3977272)
Supplement: 1321347111_pnas.201321347SI.pdf [file 1321347111_pnas.201321347SI.pdf]

# Supporting Information

Xiao et al. 10.1073/pnas.1321347111

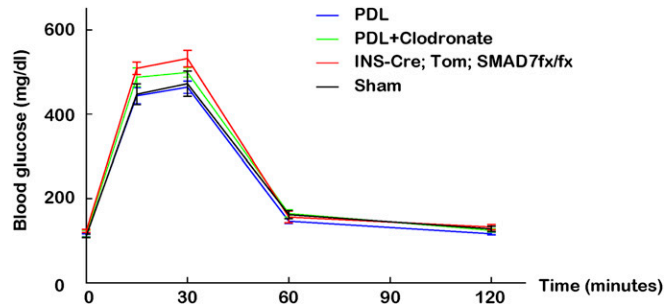

Fig. S1. Intraperitoneal glucose tolerance test (IPGTT) of the mice. IPGTT was performed in mice 1 wk after pancreatic duct ligation (PDL), with or without clodronate, or in INS-Cre; Tomato; SMAD7fx/fx mice, with controls. All of the mice seemed to have a normal glucose response.

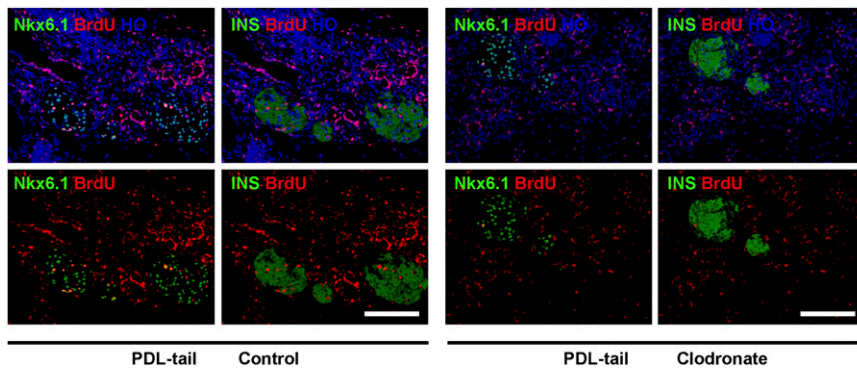

Fig. S2. Representative images of BrdU, insulin, and Nkx6.1 triple immunostaining in control and clodronate-treated pancreas. Individual color channel combinations are shown to give more detail for Fig. 2C. HO, nuclei staining. INS, insulin. (Scale bars: 50  $\mu$ m.)

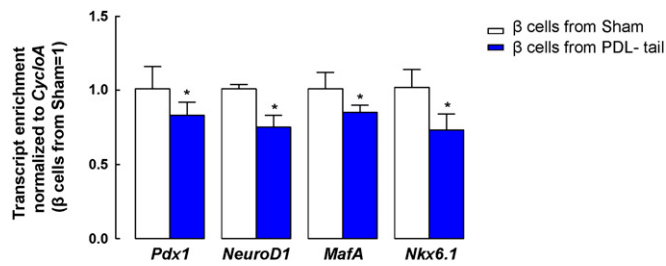

Fig. S3. Beta cells in ligated tail part of the pancreas (PDL-tail) down-regulate *Pdx1*, *NeuroD1*, *MafA*, and *Nkx6.1*. GFP<sup>+</sup> beta cells were isolated from sham MIP-GFP mice, or after PDL, by FACS. Beta cells from PDL-tail down-regulate *Pdx1*, *NeuroD1*, *MafA*, and *Nkx6.1*. \* $P < 0.05$ .



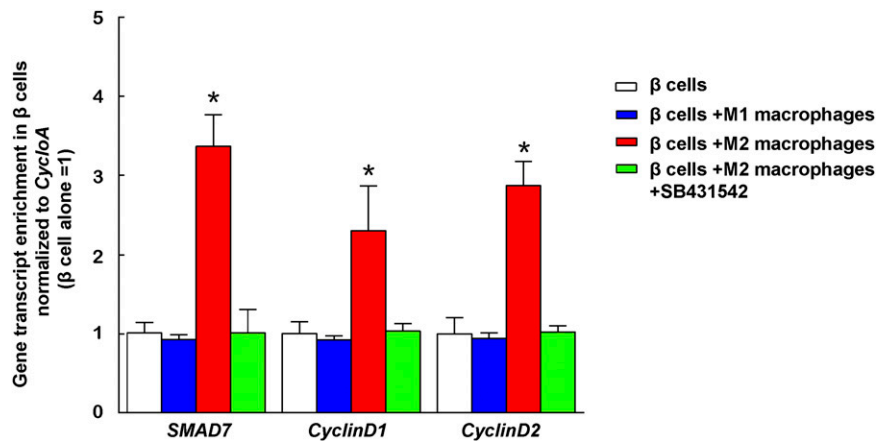

**Fig. 56.** Gene expression in beta cells in coculture with macrophages. Beta cells up-regulate Smad7, CyclinD1, and CyclinD2, when cocultured with M2 macrophages, but not when cocultured with M1 macrophages. The increase in SMAD7, CyclinD1, and CyclinD2 in beta cells by coculture with M2 macrophages was completely blocked by SB431542. \* $P < 0.05$ .

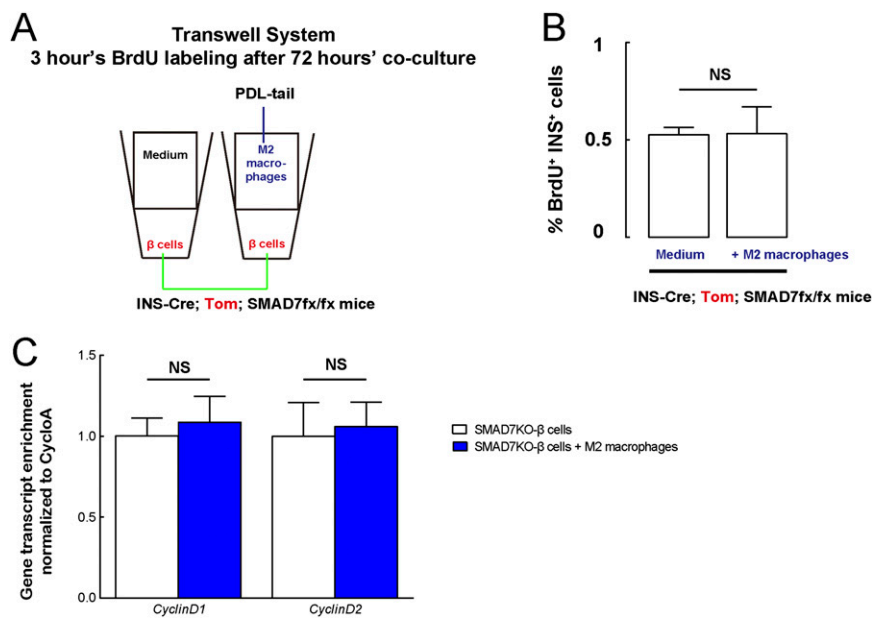

**Fig. 57.** SMAD7KO beta cells do not increase proliferation in the coculture with M2 macrophages. (A) Schematic showing coculture of beta cells from beta-cell-specific SMAD7KO with M2 macrophages from PDL-pancreas. (B and C) Loss of SMAD7 in beta cells resulted in loss of the increase in beta-cell proliferation (B) and failure to induce CyclinD1 and CyclinD2 in beta cells. NS, no significance.

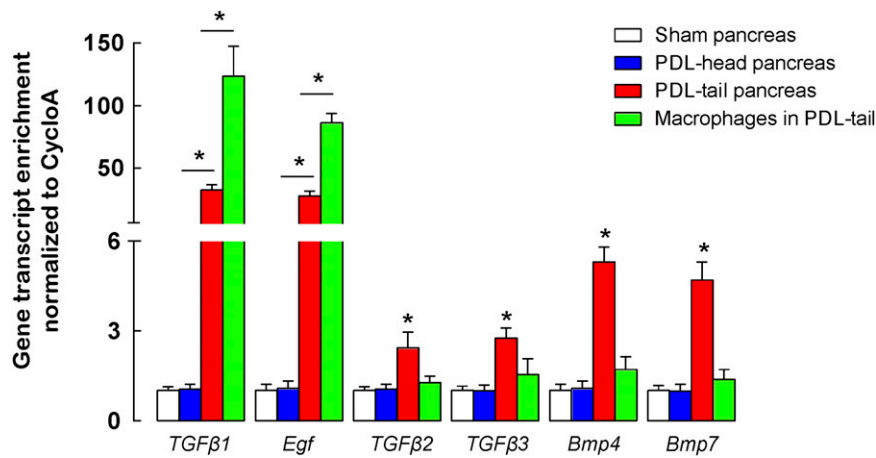

**Fig. S8.** M2 macrophages express significant levels of TGFβ1 and EGF in the PDL-tail pancreas. We did a screening of the candidate factors that may be released from M2 macrophages to affect beta-cell proliferation. Among numerous screened factors, we detected a significant increase in the mRNA levels of TGFβ1 and EGF in the PDL-tail pancreas, and specifically in M2 macrophages. A modest increase in TGFβ2, TGFβ3, Bmp4, and Bmp7 were also found in the PDL-tail pancreas, but the recruited macrophages seemed not to be the predominant source of them. Numerous other factors tested showed no difference, including activins. \* $P < 0.05$ .

**Table S1.** Individual data from quantification of beta cells in Fig. 1B

| Mouse no.       | INS <sup>+</sup> (Nkx6.1 <sup>+/-</sup> ) cells counted | BrdU <sup>+</sup> cells counted | %BrdU <sup>+</sup> INS <sup>+</sup> cells | INS <sup>+</sup> Nkx6.1 <sup>+</sup> cells counted | BrdU <sup>+</sup> cells counted | %BrdU <sup>+</sup> INS <sup>+</sup> Nkx6.1 <sup>+</sup> cells |
|-----------------|---------------------------------------------------------|---------------------------------|-------------------------------------------|----------------------------------------------------|---------------------------------|---------------------------------------------------------------|
| <b>Sham</b>     |                                                         |                                 |                                           |                                                    |                                 |                                                               |
| 1               | 3,152                                                   | 52                              | 1.65                                      | 3,137                                              | 51                              | 1.63                                                          |
| 2               | 5,617                                                   | 50                              | 0.89                                      | 5,602                                              | 49                              | 0.87                                                          |
| 3               | 5,376                                                   | 50                              | 0.93                                      | 5,369                                              | 48                              | 0.89                                                          |
| 4               | 4,553                                                   | 51                              | 1.12                                      | 4,521                                              | 50                              | 1.11                                                          |
| 5               | 5,882                                                   | 50                              | 0.85                                      | 5,869                                              | 48                              | 0.82                                                          |
| Mean            |                                                         |                                 | 1.09                                      |                                                    |                                 | 1.06                                                          |
| SE              |                                                         |                                 | 0.15                                      |                                                    |                                 | 0.15                                                          |
| <b>PDL-head</b> |                                                         |                                 |                                           |                                                    |                                 |                                                               |
| 1               | 3,517                                                   | 51                              | 1.45                                      | 3,497                                              | 50                              | 1.43                                                          |
| 2               | 3,289                                                   | 50                              | 1.52                                      | 3,278                                              | 49                              | 1.49                                                          |
| 3               | 4,065                                                   | 50                              | 1.23                                      | 4,052                                              | 49                              | 1.21                                                          |
| 4               | 3,095                                                   | 52                              | 1.68                                      | 3,082                                              | 50                              | 1.62                                                          |
| 5               | 4,906                                                   | 52                              | 1.06                                      | 4,889                                              | 51                              | 1.04                                                          |
| Mean            |                                                         |                                 | 1.39                                      |                                                    |                                 | 1.36                                                          |
| SE              |                                                         |                                 | 0.11                                      |                                                    |                                 | 0.10                                                          |
| <b>PDL-tail</b> |                                                         |                                 |                                           |                                                    |                                 |                                                               |
| 1               | 2,029                                                   | 235                             | 11.58                                     | 2,018                                              | 232                             | 11.50                                                         |
| 2               | 2,037                                                   | 295                             | 14.48                                     | 2,031                                              | 291                             | 14.33                                                         |
| 3               | 2,015                                                   | 260                             | 12.90                                     | 2,006                                              | 256                             | 12.76                                                         |
| 4               | 2,008                                                   | 199                             | 9.91                                      | 1,997                                              | 198                             | 9.91                                                          |
| 5               | 2,027                                                   | 235                             | 11.59                                     | 2,013                                              | 232                             | 11.53                                                         |
| Mean            |                                                         |                                 | 12.09                                     |                                                    |                                 | 12.01                                                         |
| SE              |                                                         |                                 | 0.76                                      |                                                    |                                 | 0.74                                                          |

**Table S2. Individual data from quantification of beta cells in Fig. 2F**

| Mouse no.         | INS <sup>+</sup> (Nkx6.1 <sup>+/-</sup> ) cells counted | BrdU <sup>+</sup> cells counted | %BrdU <sup>+</sup> INS <sup>+</sup> cells | INS <sup>+</sup> Nkx6.1 <sup>+</sup> cells counted | BrdU <sup>+</sup> cells counted | %BrdU <sup>+</sup> INS <sup>+</sup> Nkx6.1 <sup>+</sup> cells |
|-------------------|---------------------------------------------------------|---------------------------------|-------------------------------------------|----------------------------------------------------|---------------------------------|---------------------------------------------------------------|
| <b>Liposome</b>   |                                                         |                                 |                                           |                                                    |                                 |                                                               |
| 1                 | 2,011                                                   | 245                             | 12.18                                     | 1,999                                              | 242                             | 12.11                                                         |
| 2                 | 2,008                                                   | 277                             | 13.79                                     | 1,997                                              | 274                             | 13.72                                                         |
| 3                 | 2,013                                                   | 272                             | 13.51                                     | 2,002                                              | 268                             | 13.39                                                         |
| 4                 | 2,001                                                   | 206                             | 10.29                                     | 1,992                                              | 205                             | 10.29                                                         |
| 5                 | 2,024                                                   | 217                             | 10.72                                     | 2,003                                              | 212                             | 10.58                                                         |
| Mean              |                                                         |                                 | 12.10                                     |                                                    |                                 | 12.02                                                         |
| SE                |                                                         |                                 | 0.71                                      |                                                    |                                 | 0.70                                                          |
| <b>Clodronate</b> |                                                         |                                 |                                           |                                                    |                                 |                                                               |
| 1                 | 2,082                                                   | 51                              | 2.45                                      | 2,067                                              | 49                              | 2.37                                                          |
| 2                 | 3,081                                                   | 53                              | 1.72                                      | 3,055                                              | 50                              | 1.64                                                          |
| 3                 | 2,242                                                   | 50                              | 2.23                                      | 2,218                                              | 48                              | 2.16                                                          |
| 4                 | 3,095                                                   | 52                              | 1.68                                      | 3,074                                              | 51                              | 1.66                                                          |
| 5                 | 2,524                                                   | 52                              | 2.06                                      | 2,501                                              | 50                              | 2.00                                                          |
| Mean              |                                                         |                                 | 2.03                                      |                                                    |                                 | 1.97                                                          |
| SE                |                                                         |                                 | 0.15                                      |                                                    |                                 | 0.14                                                          |

**Table S3. Individual data from quantification of beta cells in Fig. 4C**

| Mouse no.                     | INS <sup>+</sup> (Nkx6.1 <sup>+/-</sup> ) cells counted | BrdU <sup>+</sup> cells counted | %BrdU <sup>+</sup> INS <sup>+</sup> cells | INS <sup>+</sup> Nkx6.1 <sup>+</sup> cells counted | BrdU <sup>+</sup> cells counted | %BrdU <sup>+</sup> INS <sup>+</sup> Nkx6.1 <sup>+</sup> cells |
|-------------------------------|---------------------------------------------------------|---------------------------------|-------------------------------------------|----------------------------------------------------|---------------------------------|---------------------------------------------------------------|
| <b>INS-Cre/Tom/SMAD7fx/fx</b> |                                                         |                                 |                                           |                                                    |                                 |                                                               |
| 1                             | 6,579                                                   | 50                              | 0.76                                      | 6,517                                              | 49                              | 0.75                                                          |
| 2                             | 4,808                                                   | 50                              | 1.04                                      | 4,773                                              | 49                              | 1.03                                                          |
| 3                             | 4,180                                                   | 51                              | 1.22                                      | 4,128                                              | 51                              | 1.24                                                          |
| 4                             | 7,083                                                   | 51                              | 0.72                                      | 6,997                                              | 49                              | 0.70                                                          |
| 5                             | 2,954                                                   | 52                              | 1.76                                      | 2,909                                              | 50                              | 1.72                                                          |
| Mean                          |                                                         |                                 | 1.10                                      |                                                    |                                 | 1.09                                                          |
| SE                            |                                                         |                                 | 0.19                                      |                                                    |                                 | 0.19                                                          |
| <b>INS-Cre/Tom</b>            |                                                         |                                 |                                           |                                                    |                                 |                                                               |
| 1                             | 2,005                                                   | 269                             | 13.42                                     | 1,996                                              | 267                             | 13.38                                                         |
| 2                             | 2,042                                                   | 255                             | 12.49                                     | 2,034                                              | 251                             | 12.34                                                         |
| 3                             | 2,019                                                   | 236                             | 11.69                                     | 2,002                                              | 235                             | 11.74                                                         |
| 4                             | 2,014                                                   | 266                             | 13.21                                     | 1,997                                              | 263                             | 13.17                                                         |
| 5                             | 2,003                                                   | 244                             | 12.18                                     | 1,989                                              | 243                             | 12.22                                                         |
| Mean                          |                                                         |                                 | 12.60                                     |                                                    |                                 | 12.57                                                         |
| SE                            |                                                         |                                 | 0.32                                      |                                                    |                                 | 0.31                                                          |

**Table S4. Individual data from quantification of beta cells in Fig. 5E**

| Mouse no.        | INS <sup>+</sup> (Nkx6.1 <sup>+/-</sup> ) cells counted | BrdU <sup>+</sup> cells counted | %BrdU <sup>+</sup> INS <sup>+</sup> cells | INS <sup>+</sup> Nkx6.1 <sup>+</sup> cells counted | BrdU <sup>+</sup> cells counted | %BrdU <sup>+</sup> INS <sup>+</sup> Nkx6.1 <sup>+</sup> cells |
|------------------|---------------------------------------------------------|---------------------------------|-------------------------------------------|----------------------------------------------------|---------------------------------|---------------------------------------------------------------|
| <b>AAV-GFP</b>   |                                                         |                                 |                                           |                                                    |                                 |                                                               |
| 1                | 2,013                                                   | 56                              | 2.78                                      | 1,987                                              | 56                              | 2.82                                                          |
| 2                | 2,096                                                   | 50                              | 2.39                                      | 2,085                                              | 49                              | 2.35                                                          |
| 3                | 4,122                                                   | 50                              | 1.21                                      | 4,057                                              | 49                              | 1.21                                                          |
| 4                | 3,877                                                   | 51                              | 1.32                                      | 3,842                                              | 51                              | 1.33                                                          |
| 5                | 2,009                                                   | 58                              | 2.89                                      | 1,994                                              | 56                              | 2.81                                                          |
| Mean             |                                                         |                                 | 2.12                                      |                                                    |                                 | 2.10                                                          |
| SE               |                                                         |                                 | 0.36                                      |                                                    |                                 | 0.35                                                          |
| <b>AAV-SMAD7</b> |                                                         |                                 |                                           |                                                    |                                 |                                                               |
| 1                | 2,005                                                   | 154                             | 7.68                                      | 1,977                                              | 152                             | 7.69                                                          |
| 2                | 2,012                                                   | 121                             | 6.01                                      | 2,001                                              | 118                             | 5.90                                                          |
| 3                | 2,033                                                   | 86                              | 4.23                                      | 2,018                                              | 83                              | 4.11                                                          |
| 4                | 2,002                                                   | 112                             | 5.59                                      | 1,981                                              | 109                             | 5.50                                                          |
| 5                | 2,018                                                   | 176                             | 8.72                                      | 1,993                                              | 171                             | 8.58                                                          |
| Mean             |                                                         |                                 | 6.45                                      |                                                    |                                 | 6.36                                                          |
| SE               |                                                         |                                 | 0.79                                      |                                                    |                                 | 0.80                                                          |
